# Supplementary material
Source: MDPI journal article supplement (https://www.mdpi.com/2311-7524/8/10/864)
Supplement: s1 [file s1]

**Supplementary Materials (horticulturae-1904925)**

**Table S1.** Data from two-way ANOVA analysis of variance of debris contamination of microspore culture preparations depending on the method of microspore isolation, linear size of buds, and genotype on the first day of cultivation.

| genotype                       | ANOVA                       | Df | SS      | MS      | F       | <i>p</i> |
|--------------------------------|-----------------------------|----|---------|---------|---------|----------|
| spring<br>rapeseed<br>'Ratnik' | intercept                   | 1  | 425.91  | 425.91  | 993.10  | 0.000000 |
|                                | isolation method            | 2  | 178.71  | 89.35   | 208.35  | 0.000000 |
|                                | bud size                    | 3  | 46.86   | 15.62   | 36.42   | 0.000000 |
|                                | isolation method × bud size | 6  | 27.13   | 4.52    | 10.55   | 0.000009 |
|                                | Error                       | 24 | 10.29   | 0.43    |         |          |
|                                | Total                       | 35 | 262.99  |         |         |          |
| European<br>radish<br>'RBK'    | intercept                   | 1  | 4732.12 | 4732.12 | 1175.96 | 0.000000 |
|                                | isolation method            | 2  | 4279.00 | 2139.50 | 531.68  | 0.000000 |
|                                | bud size                    | 4  | 576.76  | 144.19  | 35.83   | 0.000000 |
|                                | isolation method × bud size | 8  | 1673.81 | 209.23  | 51.99   | 0.000000 |
|                                | Error                       | 30 | 120.72  | 4.02    |         |          |
|                                | Total                       | 44 | 6650.29 |         |         |          |

Note: Df - Degrees of freedom; SS - sum-of-squares; MS - Mean squares; F - F ratio; *p* - P values.

**Table S2.** Data from two-way ANOVA analysis of variance of ratio of different fractions of microspores in spring rapeseed 'Ratnik' and the European radish 'RBK' microspore population according to bud size and method of isolation.

| genotype                      | fraction | ANOVA                       | Df | SS         | MS         | F       | <i>p</i> |
|-------------------------------|----------|-----------------------------|----|------------|------------|---------|----------|
| spring rape-<br>seed 'Ratnik' | №1       | intercept                   | 1  | 28,500.19  | 28,500.19  | 2864.99 | 0.000000 |
|                               |          | isolation method            | 2  | 134.02     | 67.01      | 6.77    | 0.004764 |
|                               |          | bud size                    | 3  | 25,228.80  | 8409.60    | 845.38  | 0.000000 |
|                               |          | isolation method*bud size   | 6  | 1623.28    | 270.55     | 27.20   | 0.000000 |
|                               |          | Error                       | 24 | 238.75     | 9.95       |         |          |
|                               |          | Total                       | 35 | 27,224.84  |            |         |          |
|                               | №2       | intercept                   | 1  | 77,284.00  | 77,284.00  | 5639.11 | 0.000000 |
|                               |          | isolation method            | 2  | 2175.94    | 1087.97    | 79.38   | 0.000000 |
|                               |          | bud size                    | 3  | 5966.10    | 1988.70    | 145.11  | 0.000000 |
|                               |          | isolation method*bud size   | 6  | 963.76     | 160.63     | 11.72   | 0.000004 |
|                               |          | Error                       | 24 | 328.92     | 13.71      |         |          |
|                               |          | Total                       | 35 | 9434.72    |            |         |          |
|                               | №3       | intercept                   | 1  | 21,146.01  | 21,146.01  | 1220.69 | 0.000000 |
|                               |          | isolation method            | 2  | 1883.91    | 941.95     | 54.38   | 0.000000 |
|                               |          | bud size                    | 3  | 18,231.57  | 6077.19    | 350.82  | 0.000000 |
|                               |          | isolation method × bud size | 6  | 2243.99    | 374.00     | 21.59   | 0.000000 |
|                               |          | Error                       | 24 | 415.75     | 17.32      |         |          |
|                               |          | Total                       | 35 | 22,775.22  |            |         |          |
| European rad-<br>ish 'RBK'    | №1       | intercept                   | 1  | 187,972.49 | 187,972.49 | 8912.51 | 0.000000 |
|                               |          | isolation method            | 2  | 958.38     | 479.19     | 22.72   | 0.000001 |
|                               |          | bud size                    | 4  | 20,732.35  | 5183.09    | 245.75  | 0.000000 |
|                               |          | isolation method × bud size | 8  | 1946.44    | 243.30     | 11.54   | 0.000000 |
|                               |          | Error                       | 30 | 632.73     | 21.09      |         |          |
|                               |          | Total                       | 44 | 24,269.90  |            |         |          |
|                               | №2       | intercept                   | 1  | 33,929.57  | 33,929.57  | 2164.61 | 0.000000 |
|                               |          | isolation method            | 2  | 1902.96    | 951.48     | 60.70   | 0.000000 |
|                               |          | bud size                    | 4  | 9350.82    | 2337.71    | 149.14  | 0.000000 |
|                               |          | isolation method × bud size | 8  | 1768.04    | 221.00     | 14.10   | 0.000000 |
|                               |          | Error                       | 30 | 470.24     | 15.67      |         |          |
|                               |          | Total                       | 44 | 13,492.06  |            |         |          |
|                               | №3       | intercept                   | 1  | 2604.19    | 2604.19    | 469.09  | 0.000000 |
|                               |          | isolation method            | 2  | 426.56     | 213.28     | 38.42   | 0.000000 |
|                               |          | bud size                    | 4  | 3993.61    | 998.40     | 179.84  | 0.000000 |
|                               |          | isolation method × bud size | 8  | 610.04     | 76.26      | 13.74   | 0.000000 |
|                               |          | Error                       | 30 | 166.55     | 5.55       |         |          |
|                               |          | Total                       | 44 | 5196.76    |            |         |          |

Note: Df - Degrees of freedom; SS - sum-of-squares; MS - Mean squares; F - F ratio; *p* - P values.

spring rapeseed 'Ratnik'

|                      | Df | SS        | MS        | F       | p        |
|----------------------|----|-----------|-----------|---------|----------|
| intercept            | 1  | 760,144.5 | 760,144.5 | 770.199 | 0.000000 |
| isolation            | 1  | 206,724.5 | 206,724.5 | 209.459 | 0.000000 |
| bud size             | 2  | 459,140.3 | 229,570.2 | 232.607 | 0.000000 |
| isolation × bud size | 2  | 87,440.3  | 43,720.2  | 44.299  | 0.000003 |
| Error                | 12 | 11,843.3  | 986.9     |         |          |
| Total                | 17 | 765,148.5 |           |         |          |

spring rapeseed 'Hurma'

|                      | Df | SS         | MS         | F         | p        |
|----------------------|----|------------|------------|-----------|----------|
| intercept            | 1  | 16,754,331 | 16,754,331 | 8,143.419 | 0.000000 |
| isolation            | 1  | 98,272     | 98,272     | 47.765    | 0.000016 |
| bud size             | 2  | 2,491,275  | 1,245,637  | 605.440   | 0.000000 |
| isolation × bud size | 2  | 103,531    | 51,766     | 25.161    | 0.000051 |
| Error                | 12 | 24,689     | 2,057      |           |          |
| Total                | 17 | 2,717,767  |            |           |          |

European radish 'RBK'

|                      | Df | SS      | MS      | F      | p        |
|----------------------|----|---------|---------|--------|----------|
| intercept            | 1  | 117.556 | 117.556 | 29.803 | 0.000145 |
| isolation            | 1  | 32.000  | 32.000  | 8.113  | 0.014670 |
| bud size             | 2  | 23.111  | 11.556  | 2.930  | 0.092028 |
| isolation × bud size | 2  | 36.000  | 18.000  | 4.563  | 0.033581 |
| Error                | 12 | 47.333  | 3.944   |        |          |
| Total                | 17 | 138.444 |         |        |          |

white cabbage 'Parus'

|                      | Df | SS        | MS        | F       | p        |
|----------------------|----|-----------|-----------|---------|----------|
| intercept            | 1  | 1,290.667 | 1,290.667 | 356.046 | 0.000000 |
| isolation            | 1  | 192.667   | 192.667   | 53.149  | 0.000002 |
| bud size             | 3  | 749.000   | 249.667   | 68.874  | 0.000000 |
| isolation × bud size | 3  | 151.667   | 50.556    | 13.946  | 0.000099 |
| Error                | 16 | 58.000    | 3.625     |         |          |
| Total                | 23 | 1,151.333 |           |         |          |

spring rapeseed 'Ratnik'

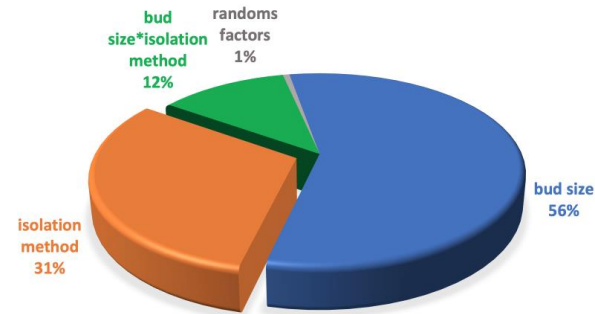

spring rapeseed 'Hurma'

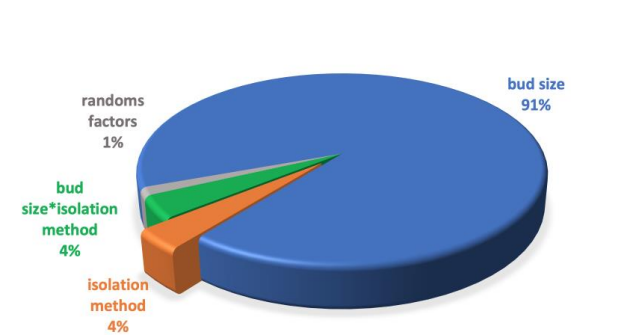

European radish 'RBK'

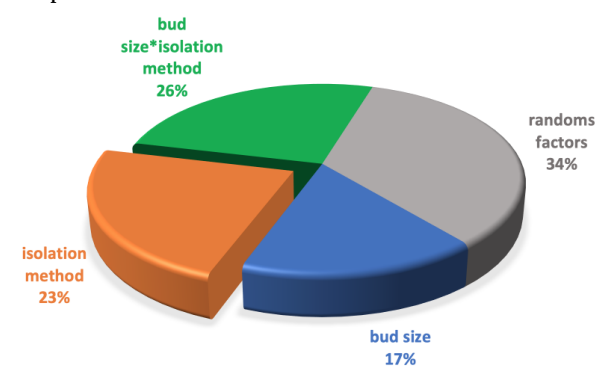

white cabbage 'Parus'

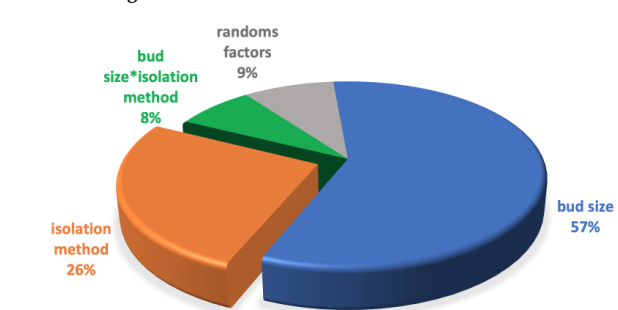

Sareptian mustard 'Sudarushka'

|                      | Df | SS        | MS        | F       | p        |
|----------------------|----|-----------|-----------|---------|----------|
| intercept            | 1  | 2,713.389 | 2,713.389 | 117.406 | 0.000000 |
| isolation            | 1  | 346.722   | 346.722   | 15.002  | 0.002215 |
| bud size             | 2  | 492.444   | 246.222   | 10.654  | 0.002187 |
| isolation × bud size | 2  | 7.111     | 3.556     | 0.154   | 0.859068 |
| Error                | 12 | 277.333   | 23.111    |         |          |
| Total                | 17 | 1,123.611 |           |         |          |

Sareptian mustard breeding accession №72

|                      | Df | SS        | MS        | F       | p        |
|----------------------|----|-----------|-----------|---------|----------|
| intercept            | 1  | 1,027.556 | 1,027.556 | 194.695 | 0.000000 |
| isolation            | 1  | 696.889   | 696.889   | 132.042 | 0.000000 |
| bud size             | 2  | 250.778   | 125.389   | 23.758  | 0.000067 |
| isolation × bud size | 2  | 119.444   | 59.722    | 11.316  | 0.001731 |
| Error                | 12 | 63.333    | 5.278     |         |          |
| Total                | 17 | 1,130.444 |           |         |          |

red cabbage breeding accession №128

|                      | Df | SS      | MS      | F         | p        |
|----------------------|----|---------|---------|-----------|----------|
| intercept            | 1  | 364.500 | 364.500 | 1,093.500 | 0.000000 |
| isolation            | 1  | 364.500 | 364.500 | 1,093.500 | 0.000000 |
| bud size             | 2  | 201.000 | 100.500 | 301.500   | 0.000000 |
| isolation × bud size | 2  | 201.000 | 100.500 | 301.500   | 0.000000 |
| Error                | 12 | 4.000   | 0.333   |           |          |
| Total                | 17 | 770.500 |         |           |          |

red cabbage breeding accession №139

|                      | Df | SS        | MS        | F       | p        |
|----------------------|----|-----------|-----------|---------|----------|
| intercept            | 1  | 1,233.389 | 1,233.389 | 331.358 | 0.000000 |
| isolation            | 1  | 329.389   | 329.389   | 88.493  | 0.000001 |
| bud size             | 2  | 1,430.778 | 715.389   | 192.194 | 0.000000 |
| isolation × bud size | 2  | 388.778   | 194.389   | 52.224  | 0.000001 |
| Error                | 12 | 44.667    | 3.722     |         |          |
| Total                | 17 | 2,193.611 |           |         |          |

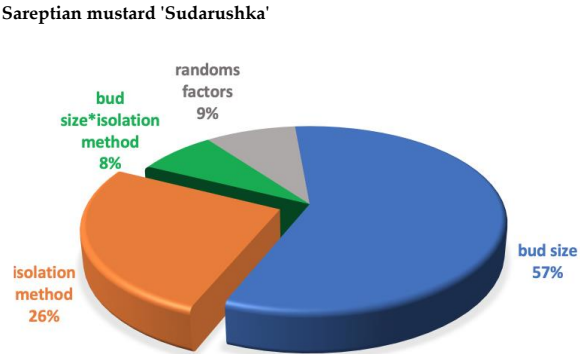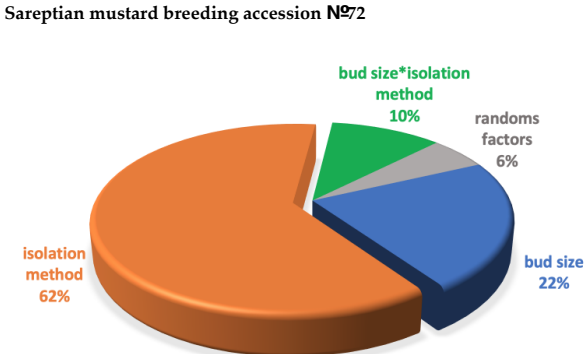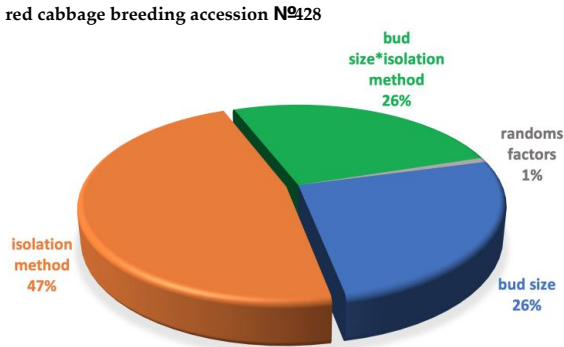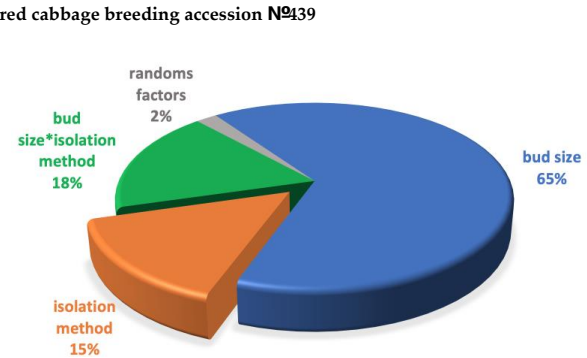

---

**Figure S1.** Data from two-way ANOVA analysis of variance and the contribution of the influence of factors of embryoid yield at day 30 of culture depending on the method of isolation method, linear size of buds, and genotype (The contribution of the influence of factors was calculated as the ratio of the SS of each factor to the total SS). Note: Df - Degrees of freedom; SS - sum-of-squares; MS - Mean squares; F - F ratio;  $p$  - P values.
